# Supplementary material for: Electronic regulation of Ni single atom by confined Ni nanoparticles for fast and energy-efficient CO2 electroreduction
Source: Research Square preprint supplement (doi:10.21203/rs.3.rs-850267/v1), 2021-09-25
Supplement: Supplementary file 1 [file 33cd8e1aa735061cf155df98.docx]

**Supplementary Information**

Electronic regulation of Ni single atom by confined Ni nanoparticles for fast and energy-efficient CO2 electroreduction

*Wenhao Ren,1,2,† Xin Tan,3,† Chen Jia, 1 Anna Krammer,4 Qian Sun,1 Jiangtao Qu,5 Sean C. Smith3,* *Andreas Schueler, 4 Xile Hu2,*, and Chuan Zhao1,**

1School of Chemistry, University of New South Wales, Sydney, New South Wales 2052, Australia. 2Laboratory of Inorganic Synthesis and Catalysis, Institute of Chemical Sciences and Engineering, Ecole Polytechnique Fédérale de Lausanne (EPFL), ISIC-LSCI, 1015 Lausanne, Switzerland. 3Integrated Materials Design Laboratory, Department of Applied Mathematics, Research School of Physics, The Australian National University Canberra, ACT 2601 (Australia). 4Ecole Polytechnique Fédérale de Lausanne, Solar Energy and Building Physics Laboratory, EPFL LESO-PB, Lausanne, Switzerland. 5Australian Centre for Microscopy and Microanalysis, the University of Sydney, 2006, NSW, Australia. †These authors contributed equally to this work. Correspondence and requests for materials should be addressed to C.Z. (chuan.zhao@unsw.edu.au) and X.H. (xile.hu@epfl.ch).

DFT calculations. All of the spin-polarized DFT calculations were performed using the VASP program,1-3 which uses a plane-wave basis set and a projector augmented wave method (PAW) for the treatment of core electrons. The Perdew, Burke, and Ernzerhof exchange-correlation functional within a generalized gradient approximation (GGA-PBE)4 was used in our calculations, and the van der Waals (vdW) correction proposed by Grimme (DFT-D3)5 was employed due to its good description of long-range vdW interactions. For the expansion of wavefunctions over the plane-wave basis set, a converged cutoff was set to 450 eV.

Graphene/Ni(111) systems were modelled by four layers of Ni(111) and one layer of graphene in (5 × 5) supercell with periodical boundary conditions, as shown in Figure 1a. During structure optimizations, the graphene monolayers and top two layers of the Ni were allowed to move. In order to simulate the Ni-nitrogen-doped carbon catalysts, a (5 × 5) graphene supercell with periodical boundary conditions was used, and then, some carbon atoms were removed to create NiN4, and NiN3V. A vacuum of 12 Å along the *z*-direction was used. The Brillouin zone was sampled using (3 × 3 × 1) Γ-centred mesh. In geometry optimizations, all the atomic coordinates were fully relaxed up to the residual atomic forces smaller than 0.01 eV/Å, and the total energy was converged to 10−4 eV. The electron distribution and transfer mechanism were determined by using Bader analysis.6

For CO2RR on Ni-nitrogen-doped carbon catalysts, we considered the reaction mechanism of CO2RR to CO through the adsorbed intermediates COOH* and CO*. The free energy changes at each electrochemical step involving a proton-electron transfer were computed based on the computational hydrogen electrode (CHE) model,7 in which the free energy of equals to for standard hydrogen electrode (SHE). The free energy of adsorbates and non-adsorbed gas-phase molecules is calculated as , where is the electronic energy calculated by DFT; is the zero point energy (ZPE), is heat capacity, is temperature and is entropy. Here, the correction terms are present in Table S1, which are from previous literature.8 Additionally, a correction of -0.51 eV for non-adsorbed gas-phase CO molecule has to be made due to the use of PBE functional.7 The solvation effects have been included for COOH* and CO* by stabilizing 0.25 and 0.10 eV, respectively.7,8

The overall hydrogen evolution reaction (HER) mechanism is evaluated with a three-state diagram consisting of an initial H+ state, an intermediate H* state, and 1/2 H2 as the final product. The free energy of H* () is proven to be a key descriptor to characterize the HER activity of the electrocatalyst. An electrocatalyst with a positive value leads to low kinetics of adsorption of hydrogen, while a catalyst with a negative value leads to low kinetics of release of the hydrogen molecule.9 The optimum value of should be zero; for instance, this value for the well-known highly efficient Pt catalyst is near-zero as .[9] The is calculated as9

(1)

where is the binding energy of adsorbed hydrogen, and and are the difference in ZPE and entropy between the adsorbed hydrogen and hydrogen in the gas phase, respectively. As the contribution from the vibrational entropy of hydrogen in the adsorbed state is negligibly small, the entropy of hydrogen adsorption is , where is the entropy of H2 in the gas phase at the standard conditions. Therefore, Eq. (1) can be rewritten as9

(2)

To calculate the deformation electronic density of graphene/Ni(111) structure, we defined the deformation electronic density of graphene/Ni(111) structure as , where represent the charge density of the graphene/Ni(111) system, and and represent the charge densities of the bare Ni(111) and the graphene layer at the same coordinates as those in the graphene/Ni(111) system, respectively.


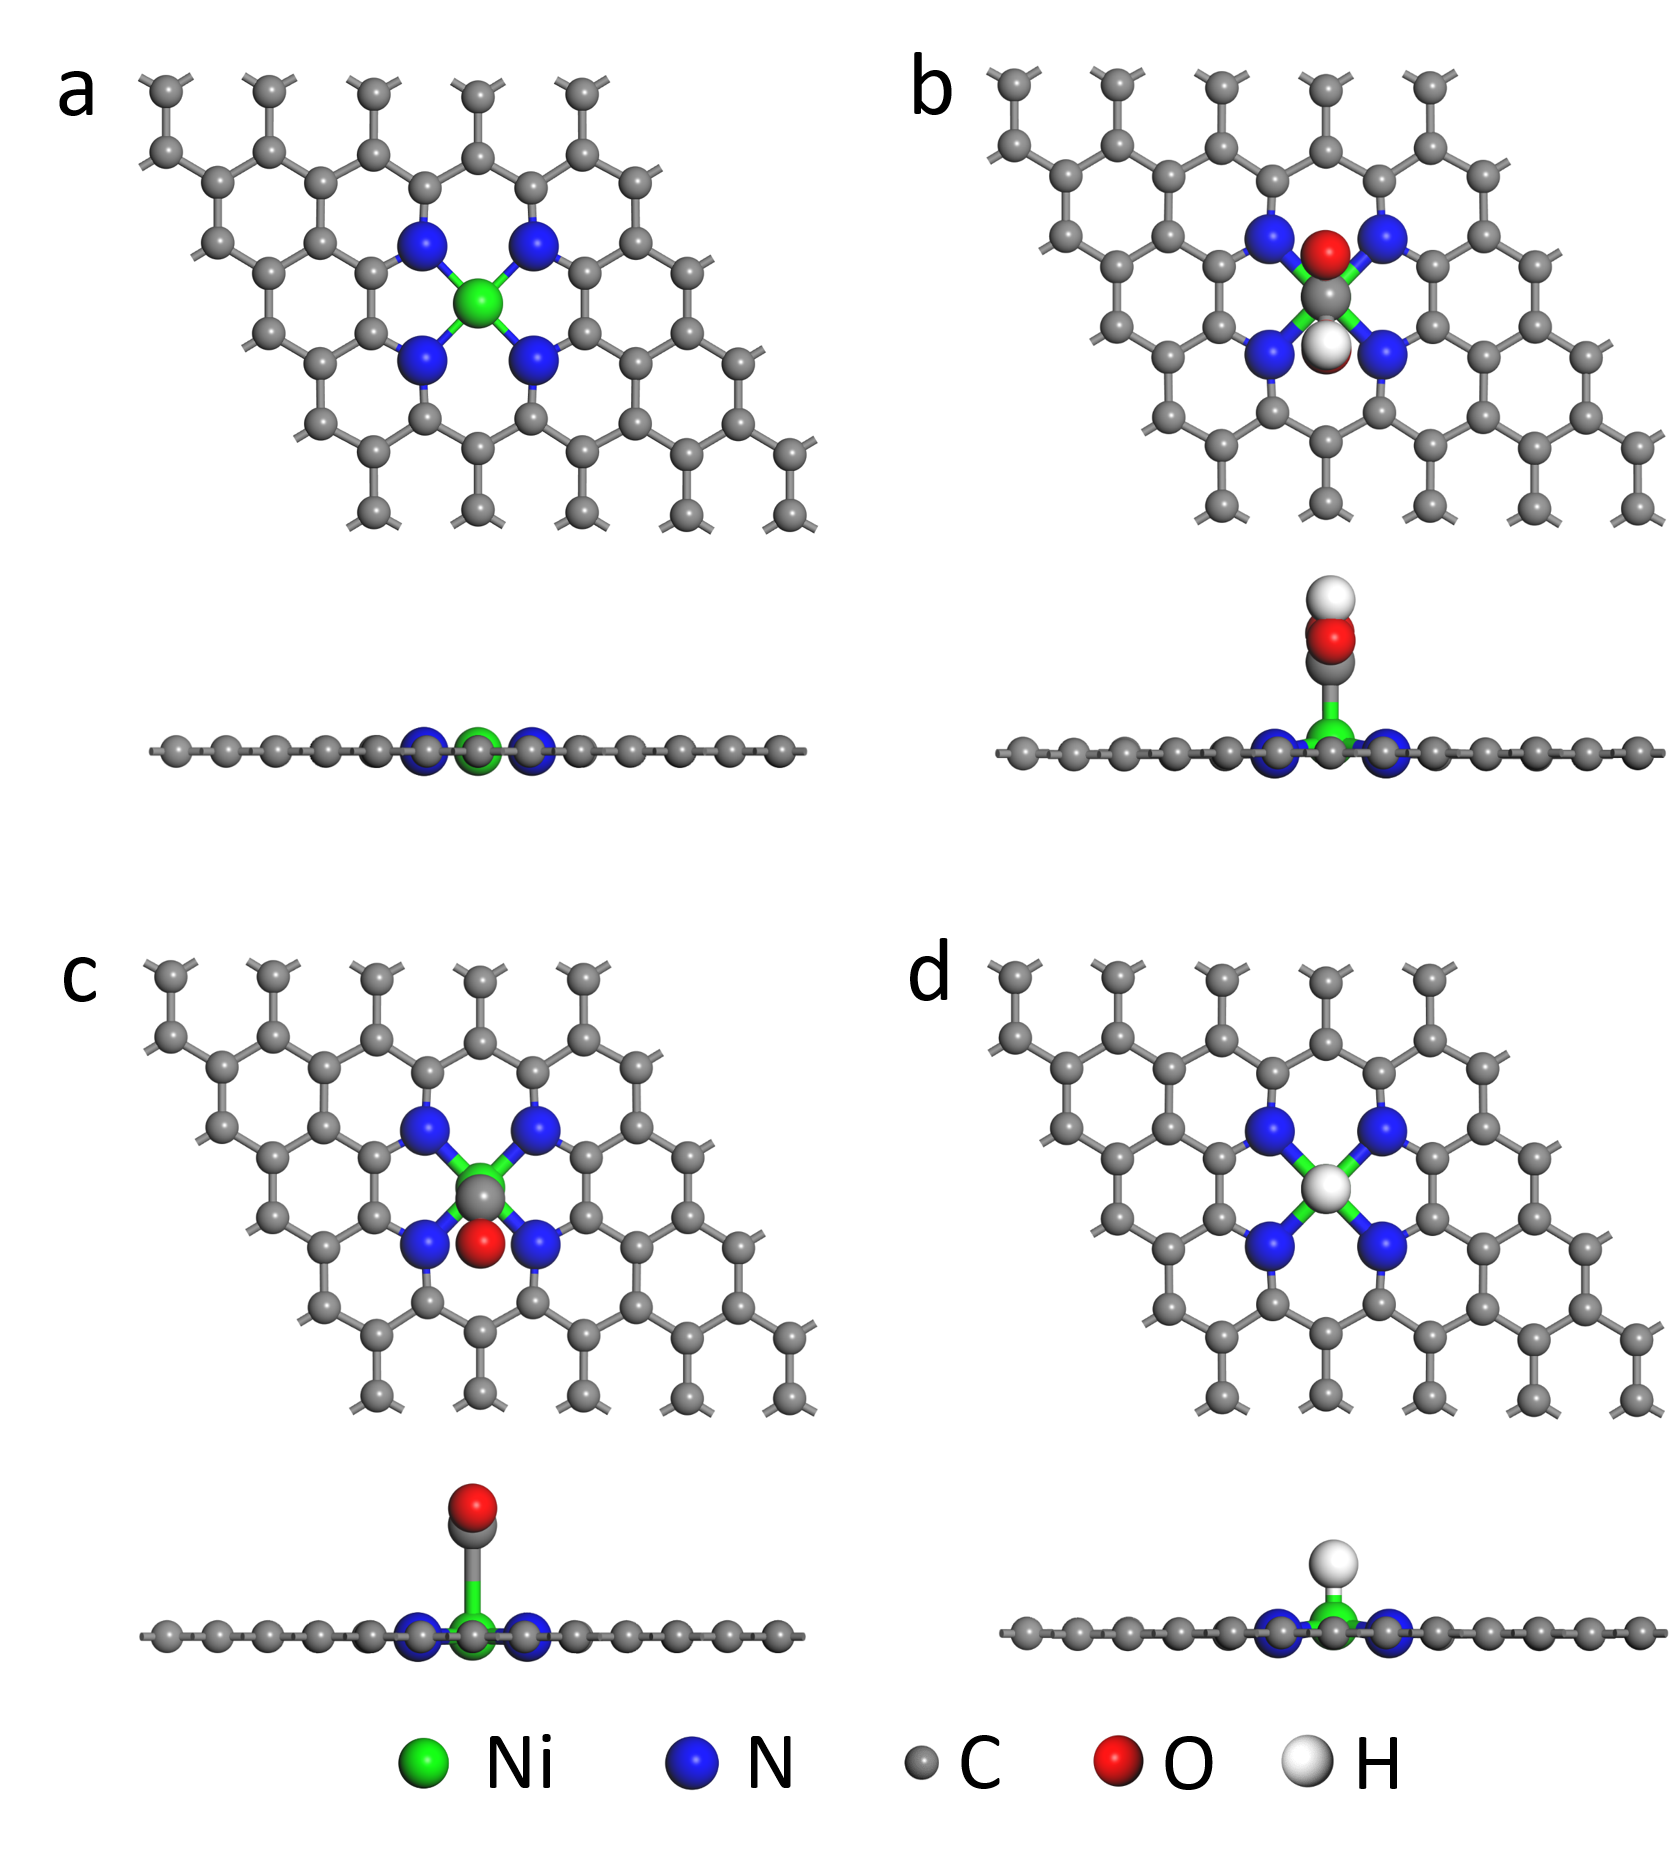


**Supplementary Figure 1 | Optimized NiN4 model with different intermediates.** Top and side views of the (**a**) bare NiN4, (**b**) NiN4 with COOH*, (**c**) NiN4 with CO*, and (**d**) NiN4 with H*.


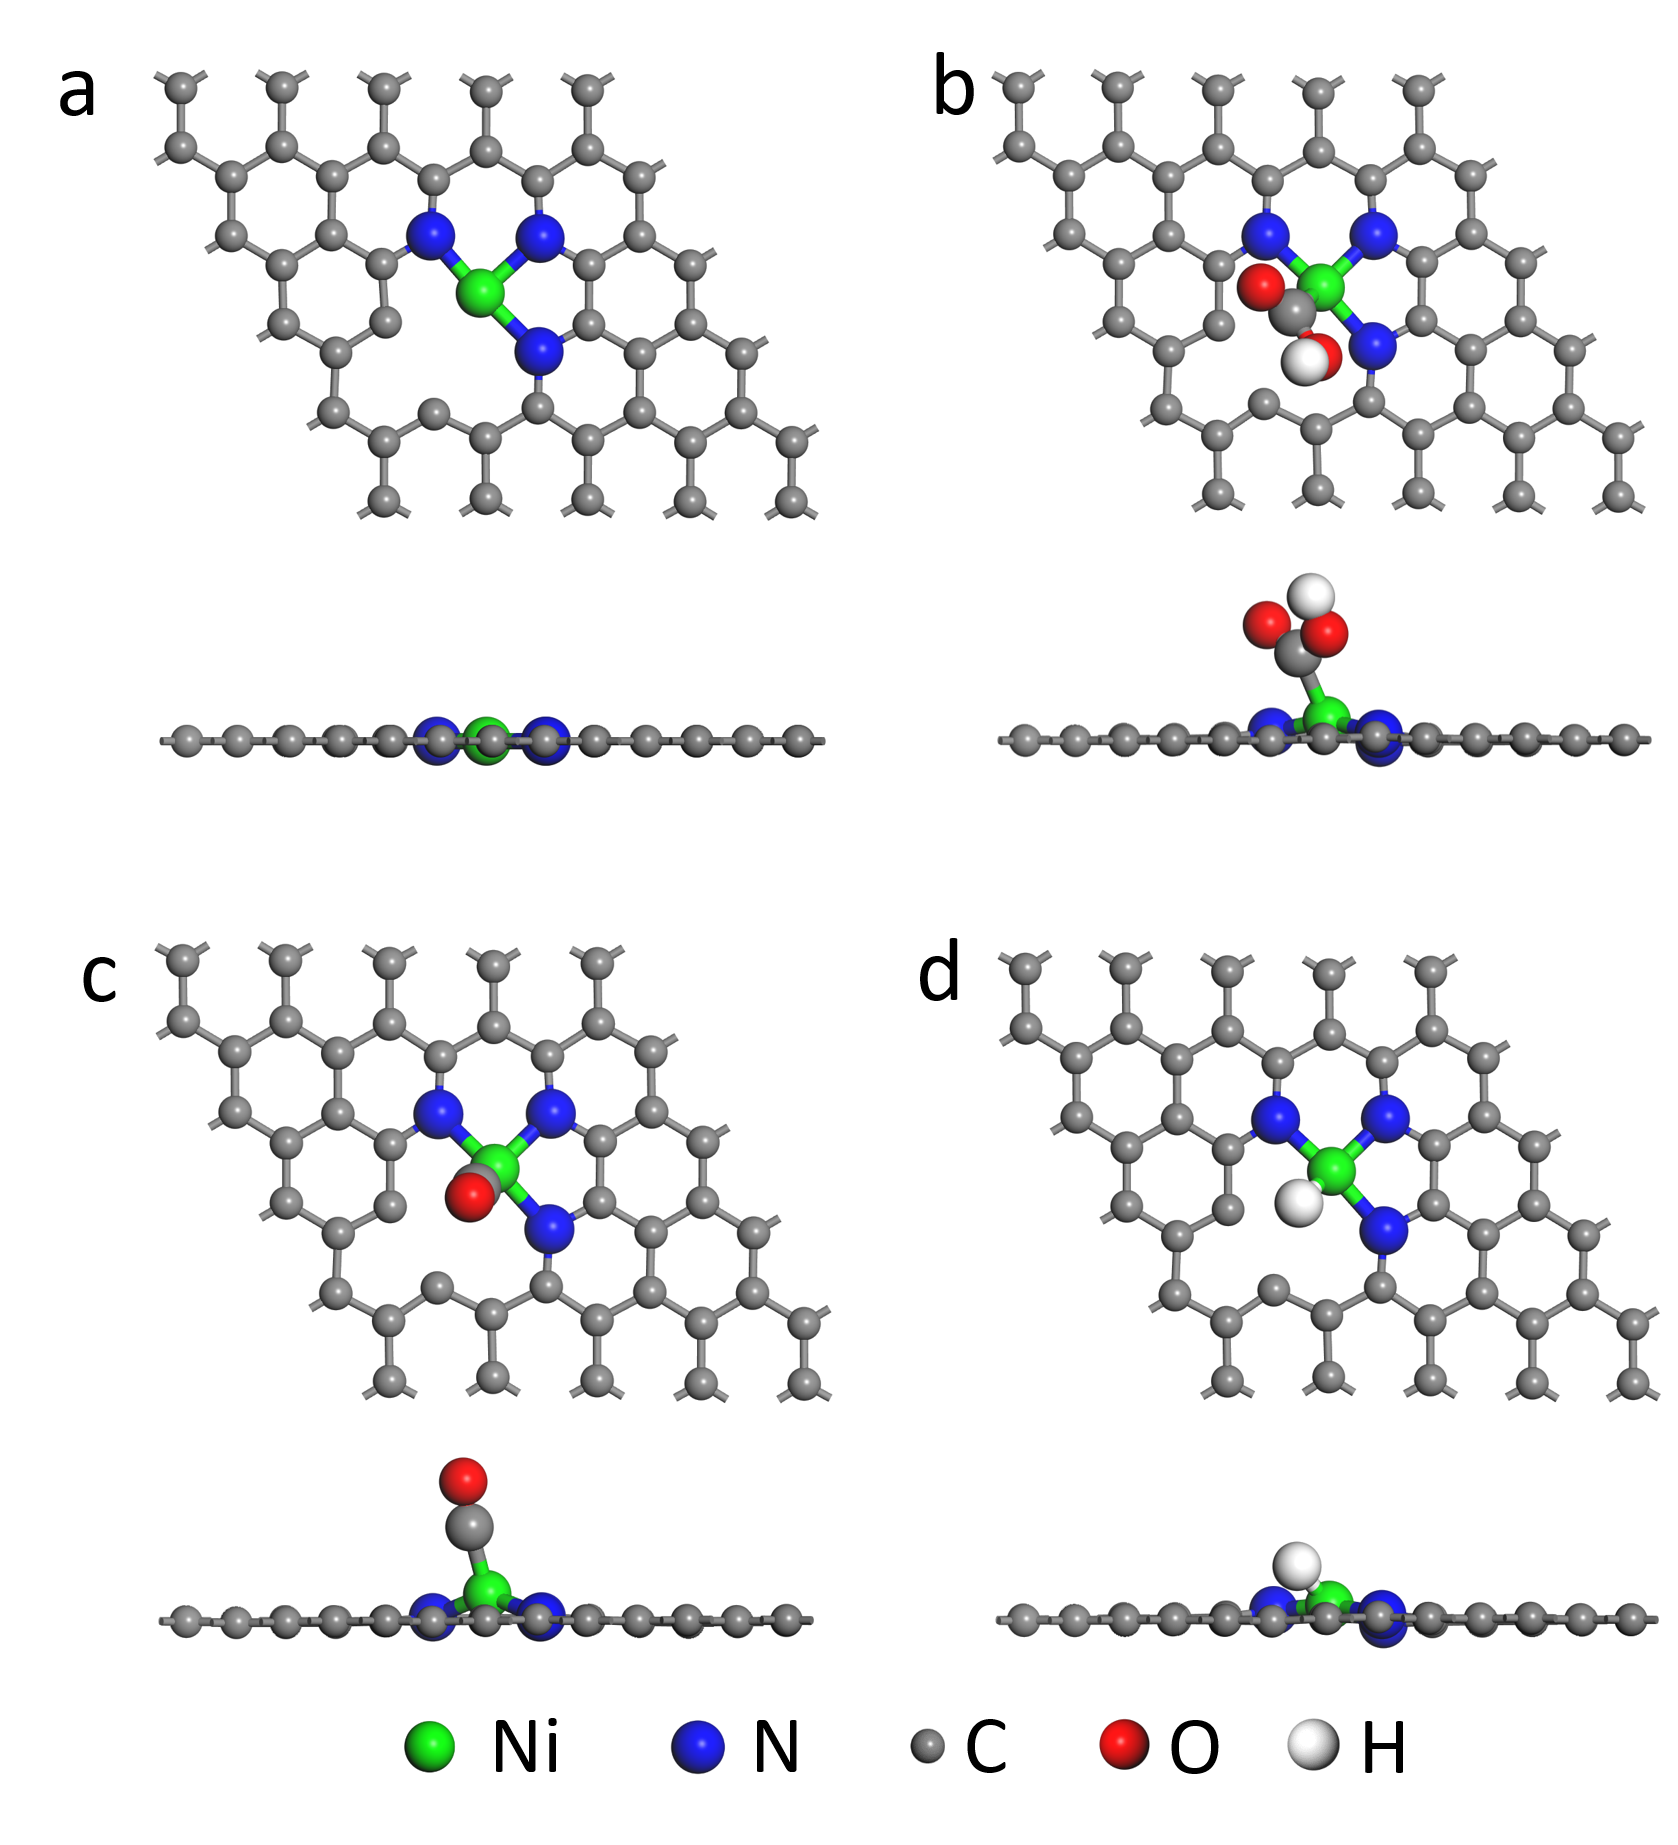


**Supplementary Figure 2 | Optimized NiN3V model with different intermediates.** Top and side views of the (**a**) bare NiN4, (**b**) NiN4 with COOH*, (**c**) NiN4 with CO*, and (**d**) NiN4 with H*.


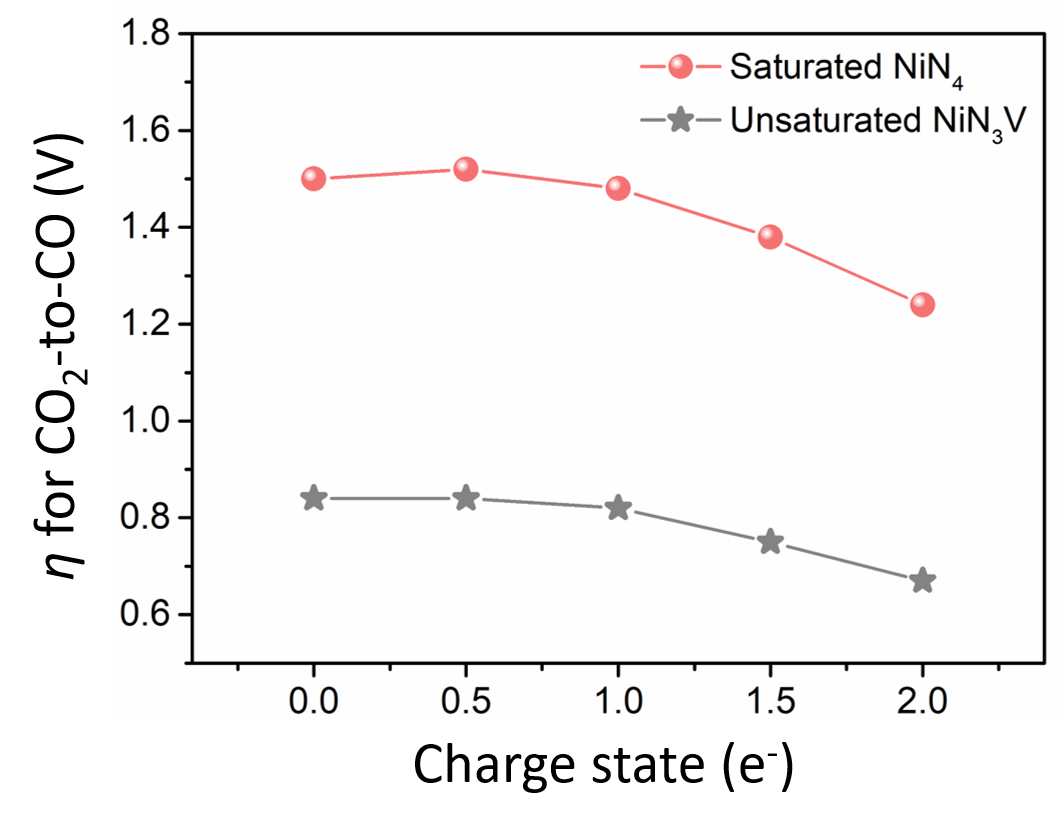


**Supplementary Figure 3 | The calculated overpotential (*η*) of CO2RR on neutral and negatively charged Ni–N-C structures.**


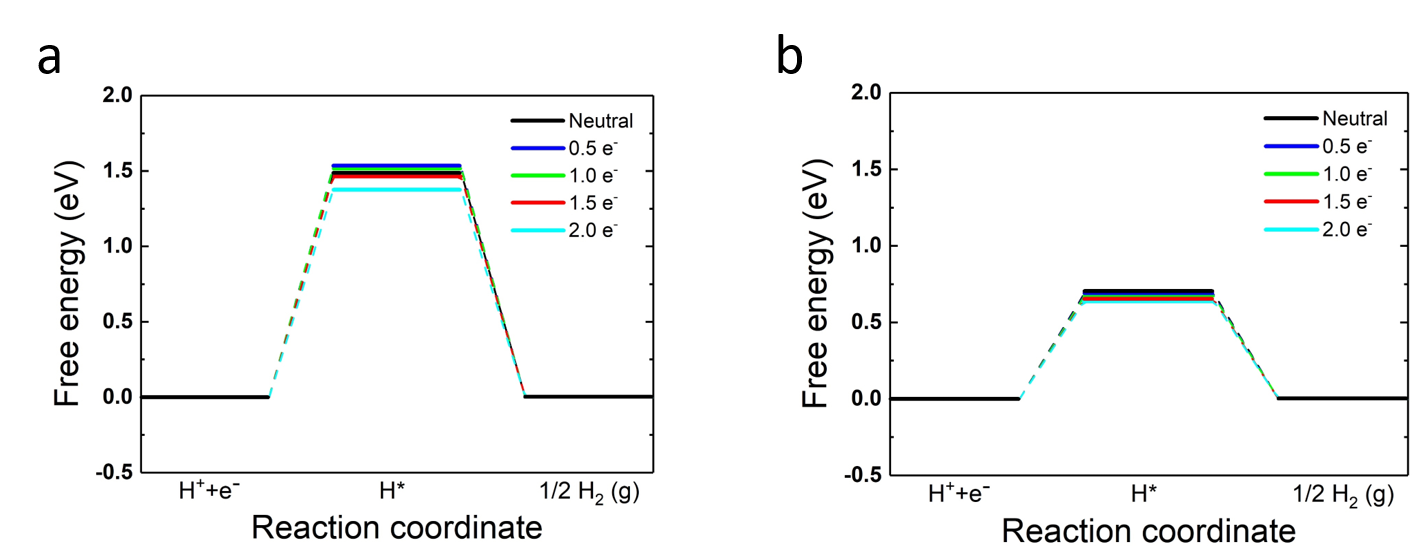


**Supplementary Figure 4 | The calculated free energy diagrams for HER on neutral and negatively charged NiN4 (a) and NiN3V (b).**


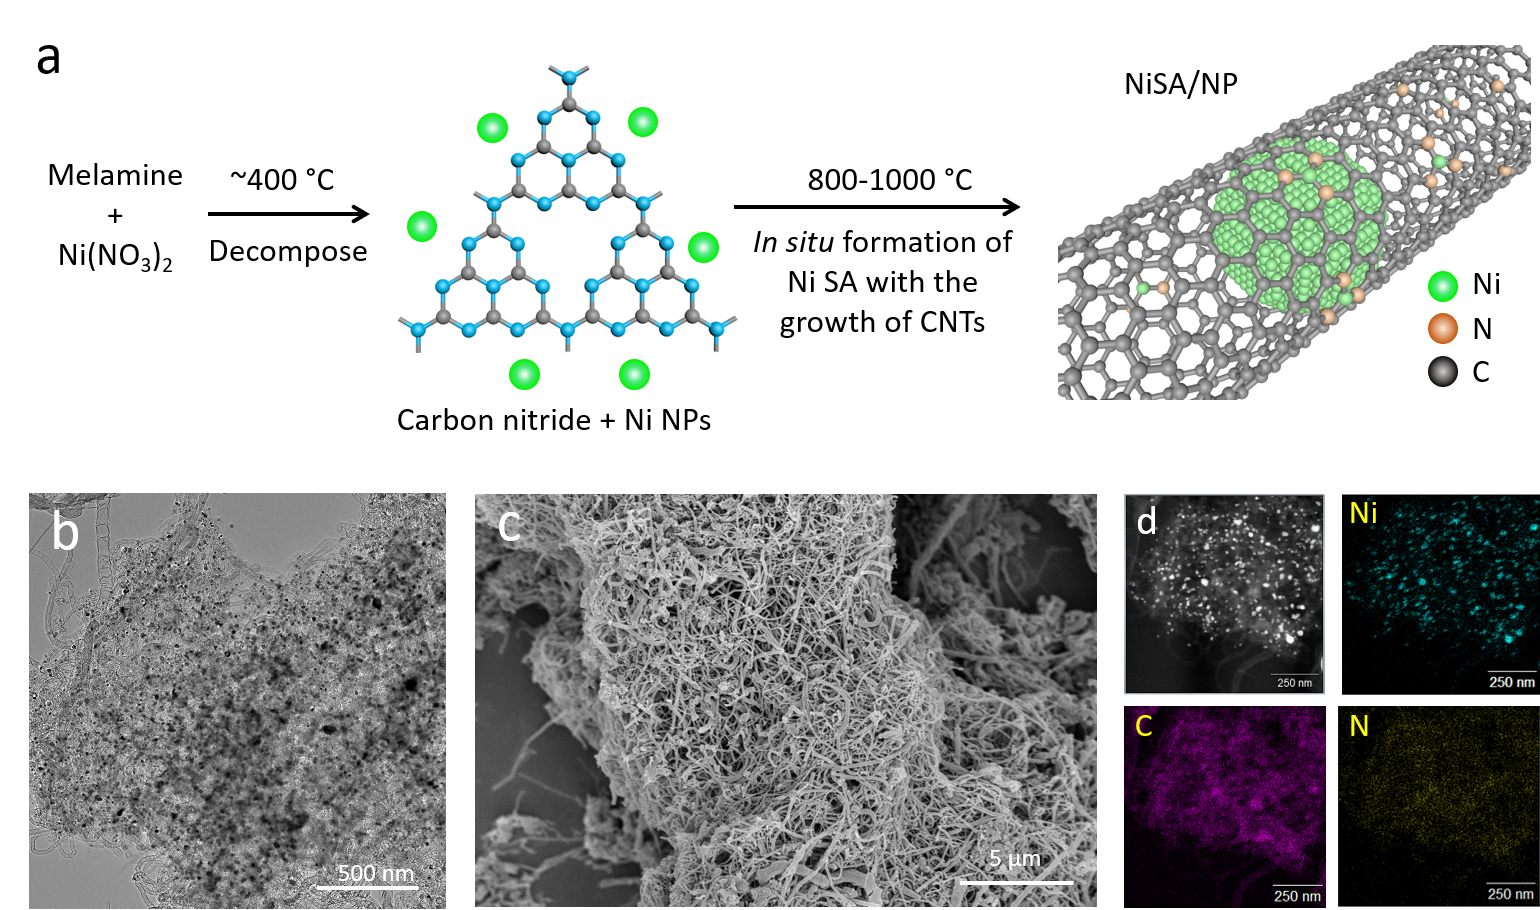


**Supplementary Figure 5 | Synthesis and characterization of NiSA/NP.** (**a**)The schematic illustration of the formation mechanism of Ni single atom on nanoparticle catalyst. (**b**) TEM, (**c**) SEM, and (**d**) EDS mapping of NiSA/NP.


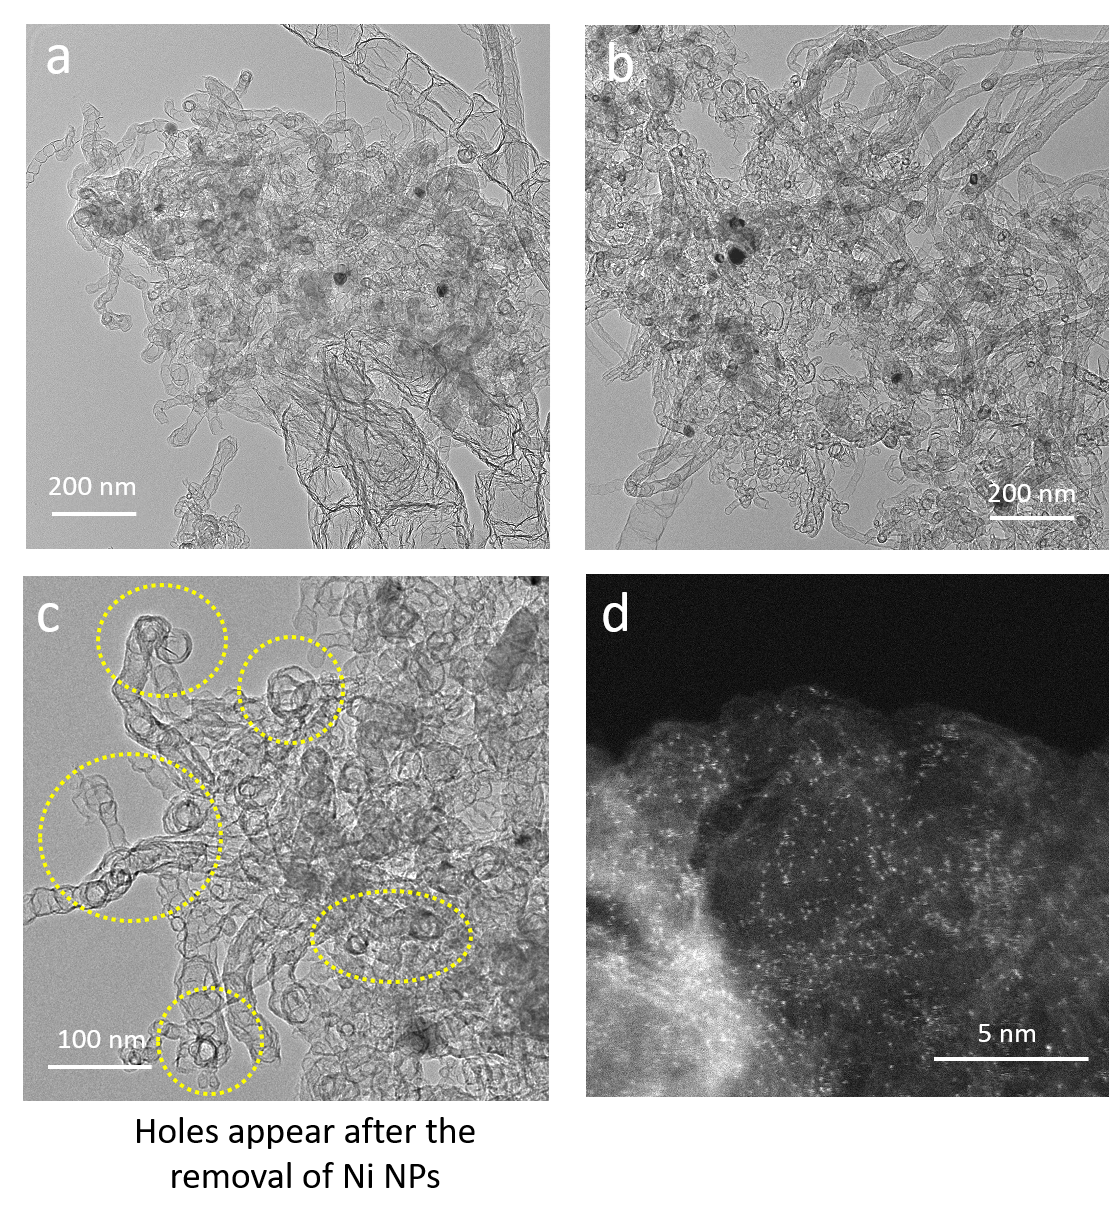


**Supplementary Figure 6 | Synthesis and characterization of NiSA.** (**a-c**)TEM and (**d**) HAADF-STEM images of NiSA. Most of the Ni NPs in NiSA/NP were removed after the NH4Cl treatment and the holes inside of CNTs formed.


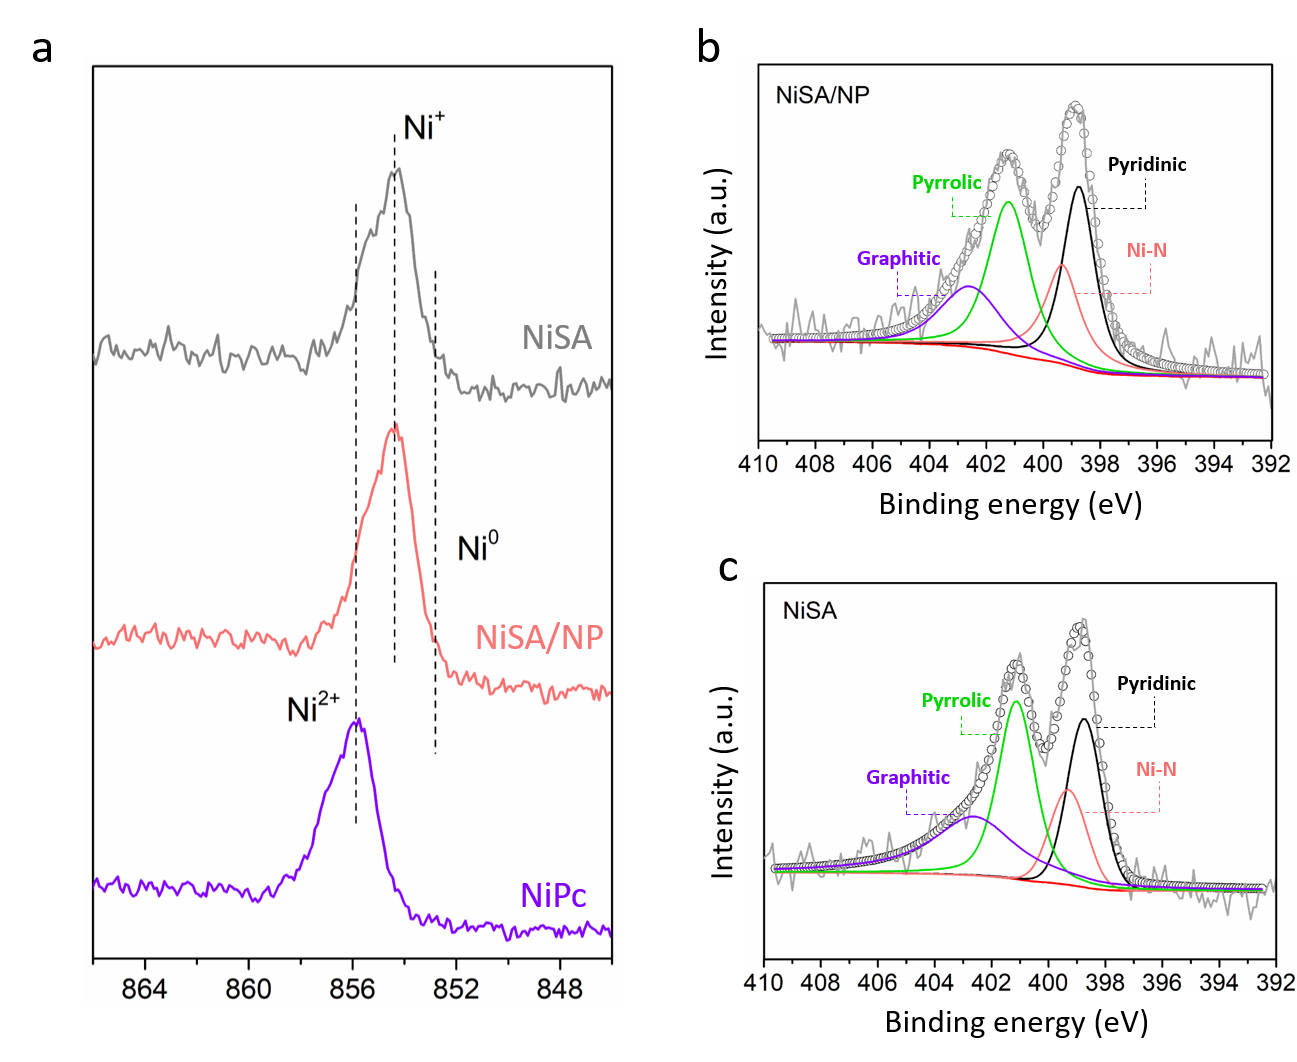


**Supplementary Figure 7 |** **X-ray photoelectron spectroscopy (XPS) analysis.** (**a**) Ni 2p spectra of NiSA, NiSA/NP and NiPc. N 1s spectra of NiSA/NP (**b**), and NiSA (**c**). No metallic Ni peak can be observed in XPS, which can be attributed to the fully confined Ni nanoparticles inside of CNTs that exceeds the detection limit of XPS.


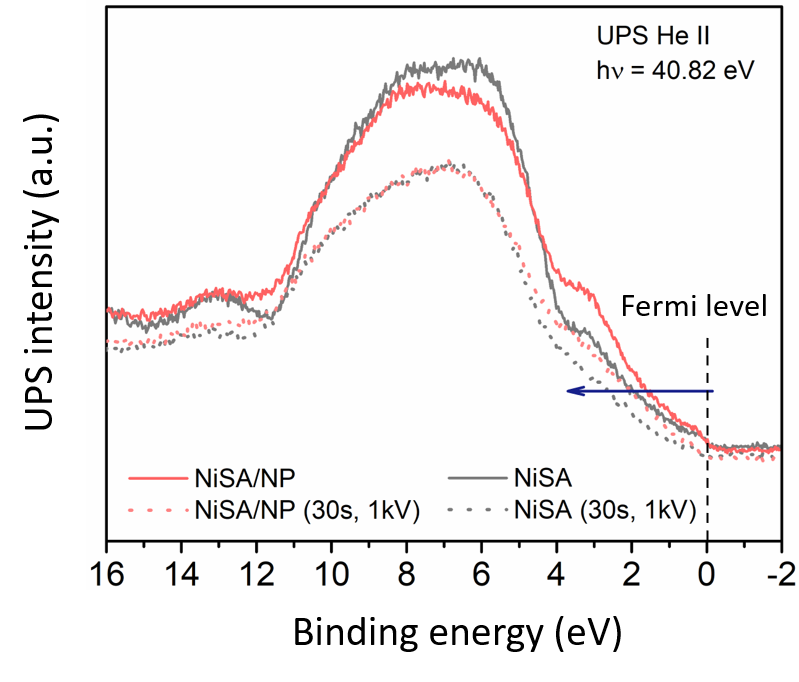


**Supplementary Figure 8 | Normalized UPS He II spectra of NiSA/NP and NiSA** **before and after an Ar sputter cleaning of 30 s at 1 kv.**


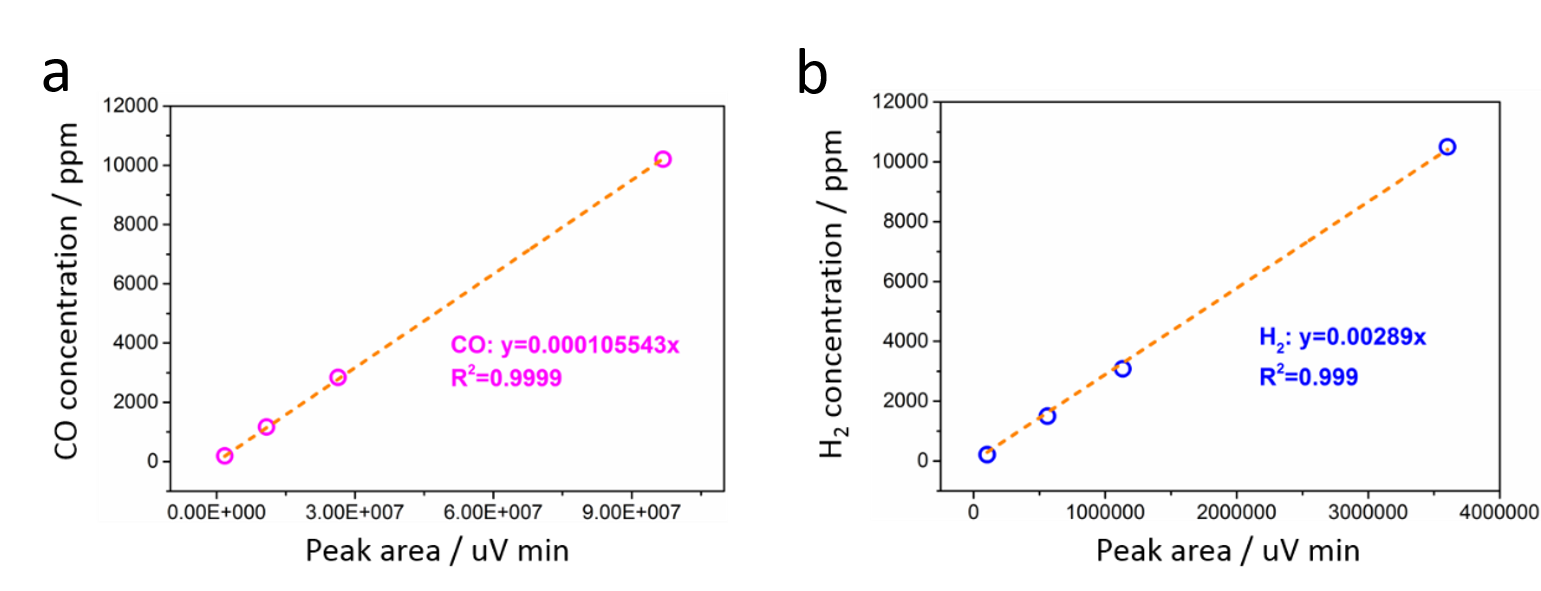


**Supplementary Figure 9 | GC Calibration curves for (a) CO and (b) H2 quantification.**


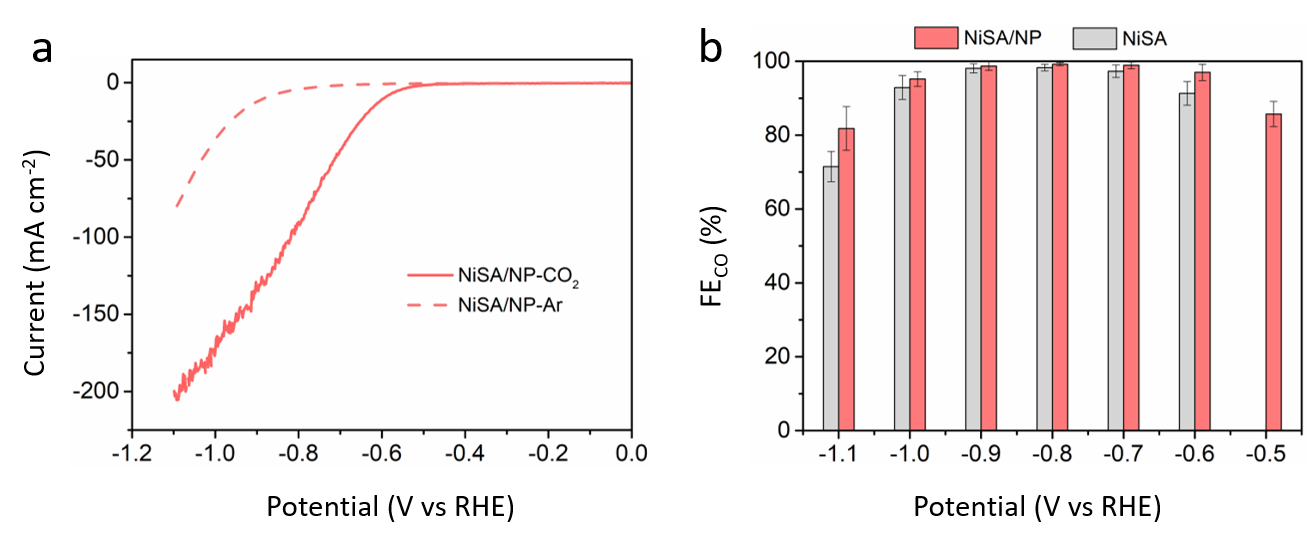


**Supplementary Figure 10 | CO2RR in H-cells.** (**a**) LSV curves of NiSA/NP in CO2 and Ar atmosphere. (**b**) FECO of NiSA/NP and NiSA from -0.5 V to -1.1 V vs RHE.


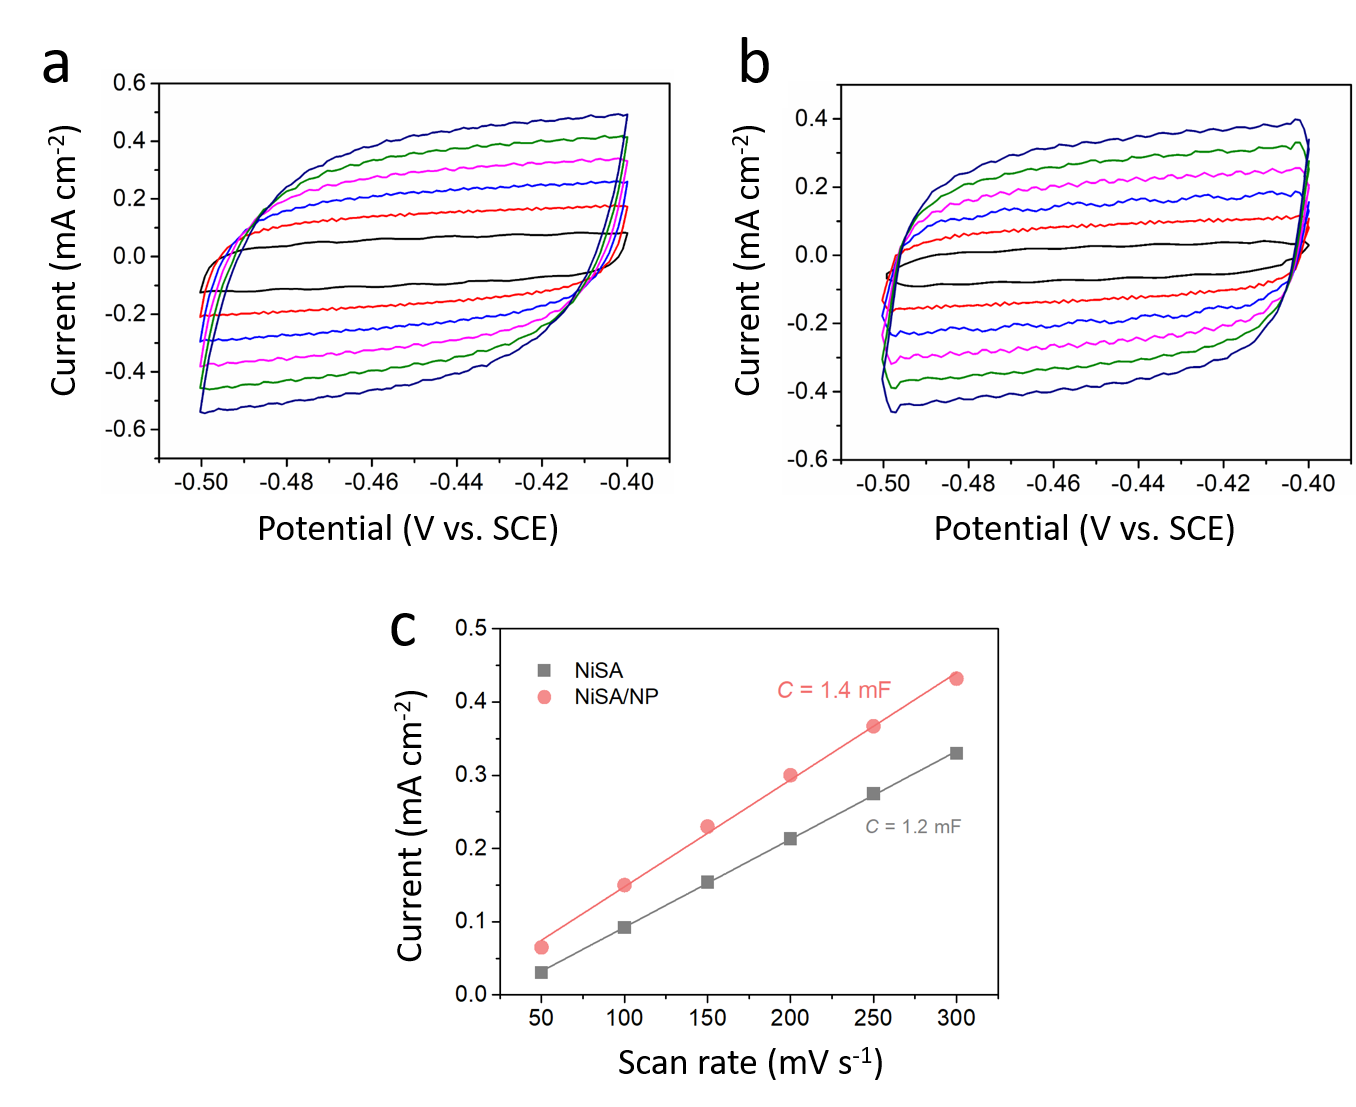


**Supplementary Figure 11 | Electrochemically active surface area (ECSA) estimated from the double-layer capacitance.** (**a,b**)CV curves at different scan rates from 50 to 300 mV s-1 for NiSA/NP and NiSA, respectively.


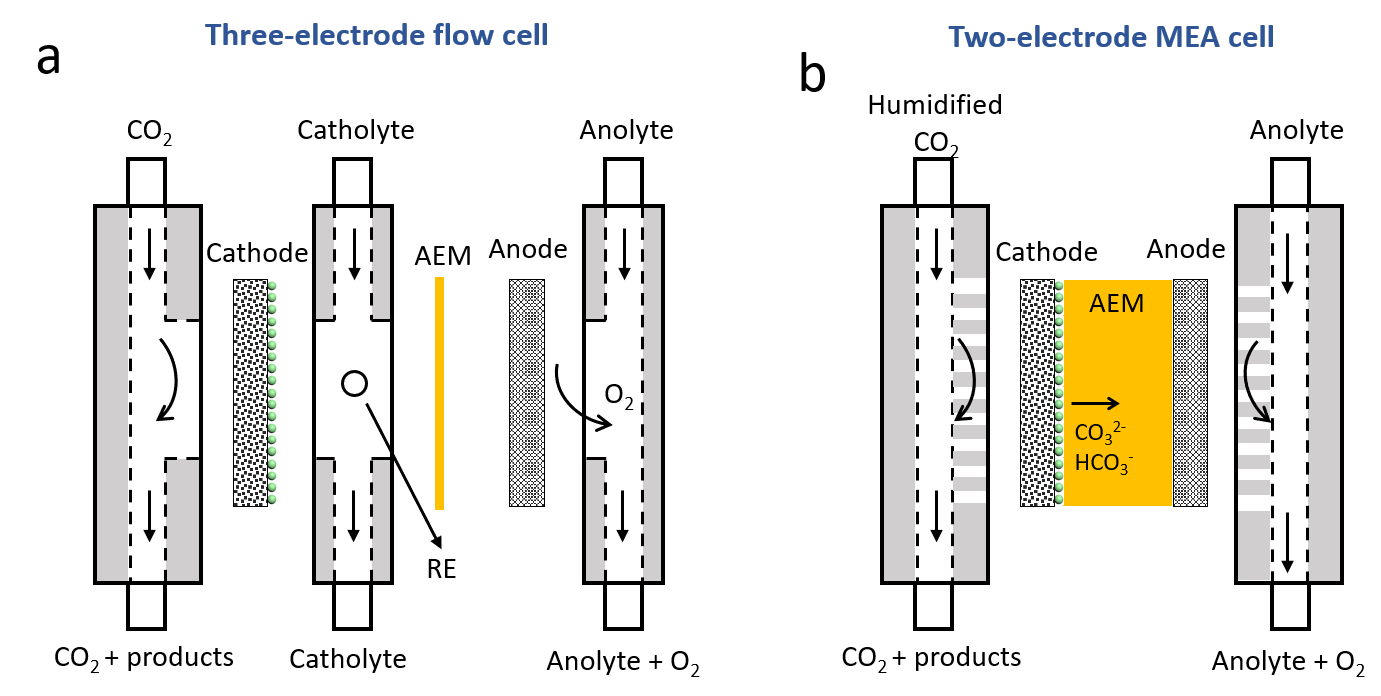


**Supplementary Figure 12 | The schematic illustration of home-customized (a) three-electrode flow cell, and (b) two-electrode MEA device.**


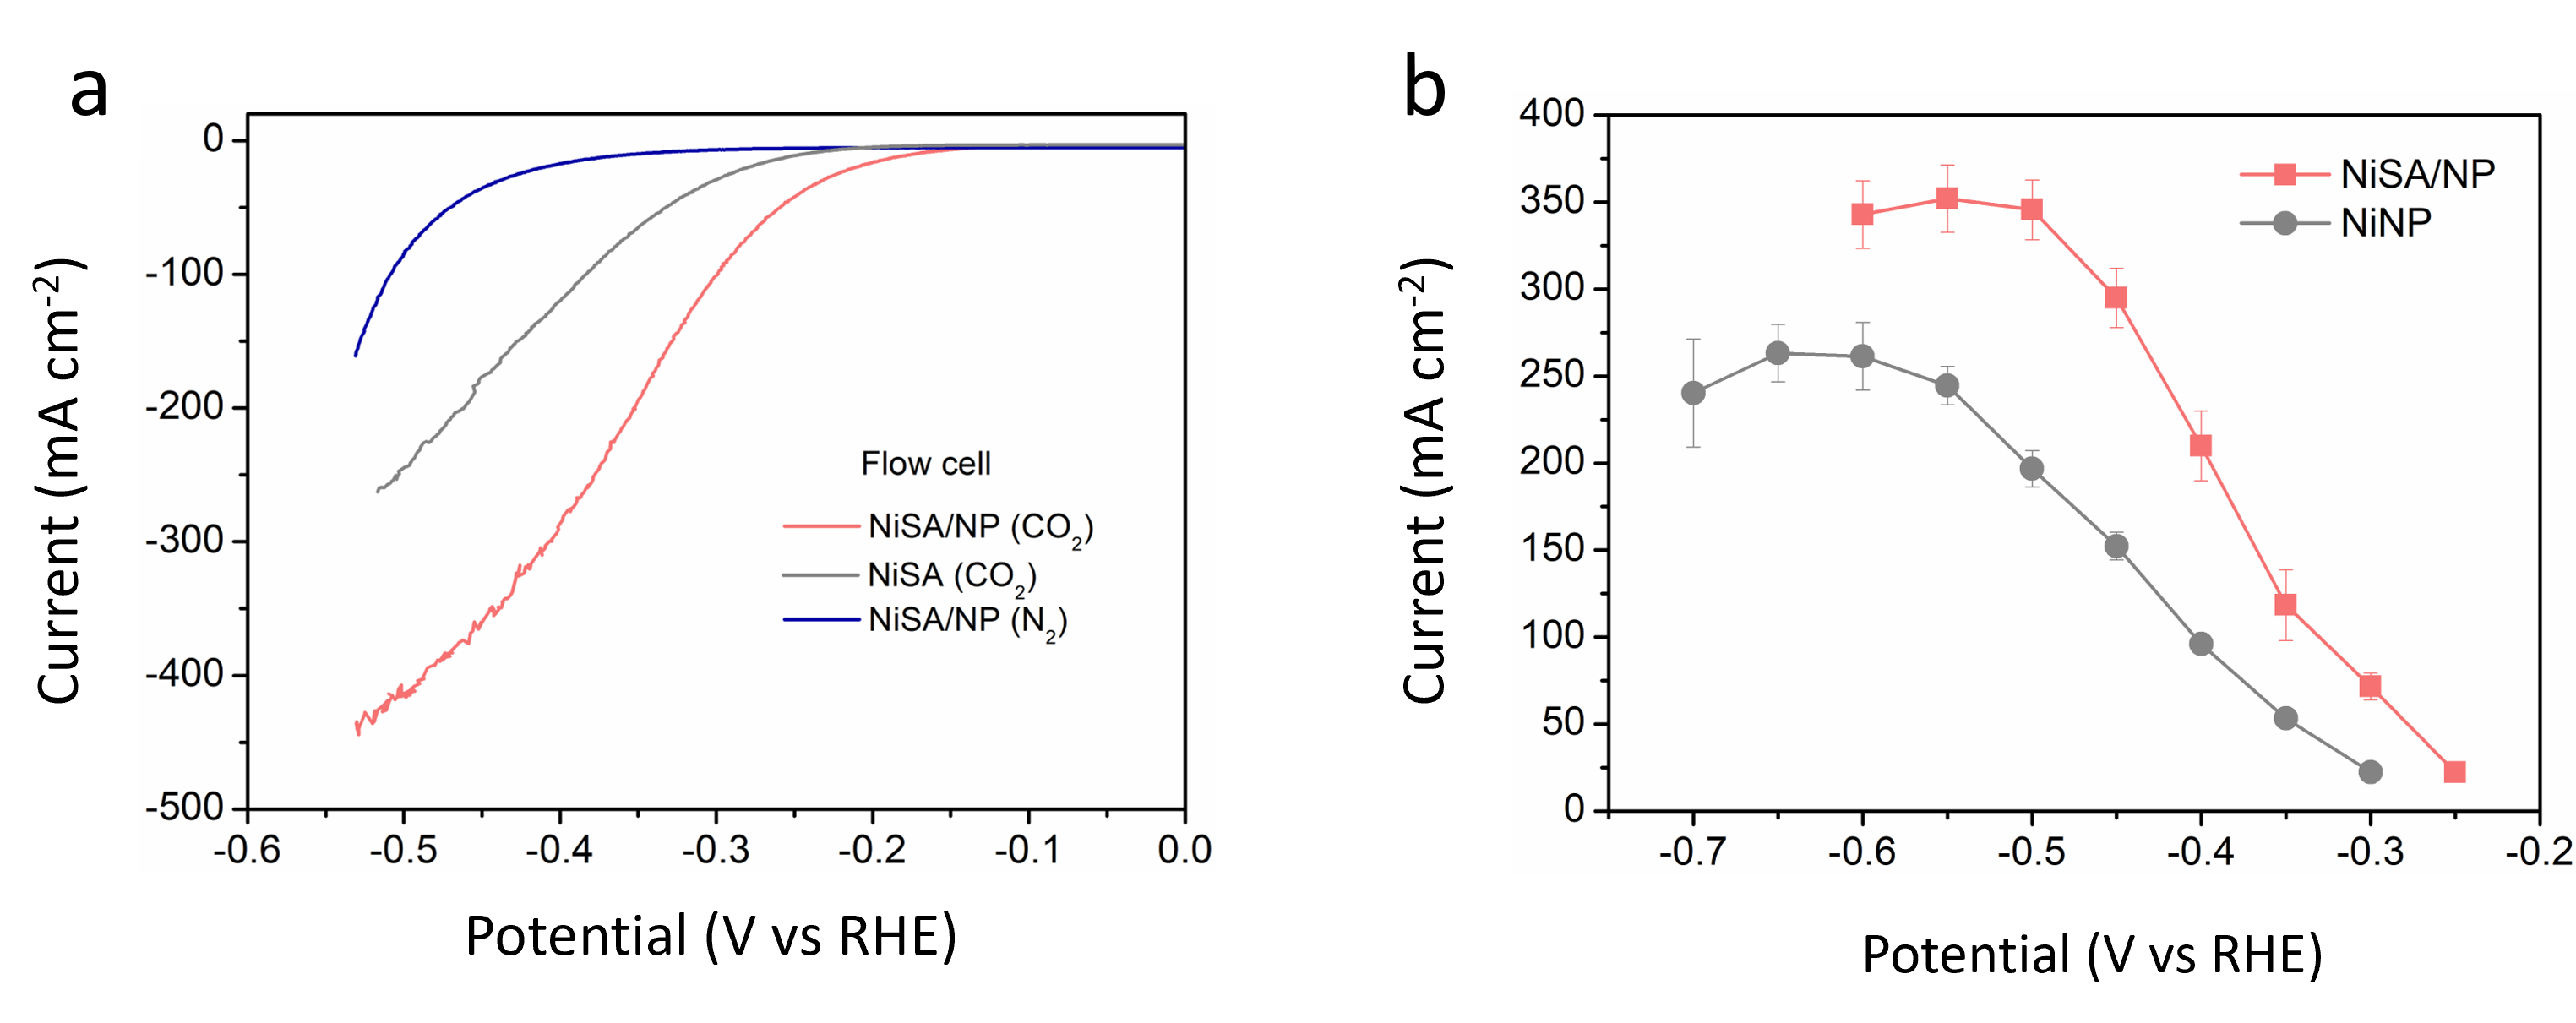


**Supplementary Figure 13 | Electrochemical CO2RR in flow cell with 1 M KOH electrolyte.** (**a**) The LSV curve of NiSA/NP and NiSA at a scan rate of 10 mV s-1. (**b**) *j*CO of NiSA/NP and NiSA as a function of potential.


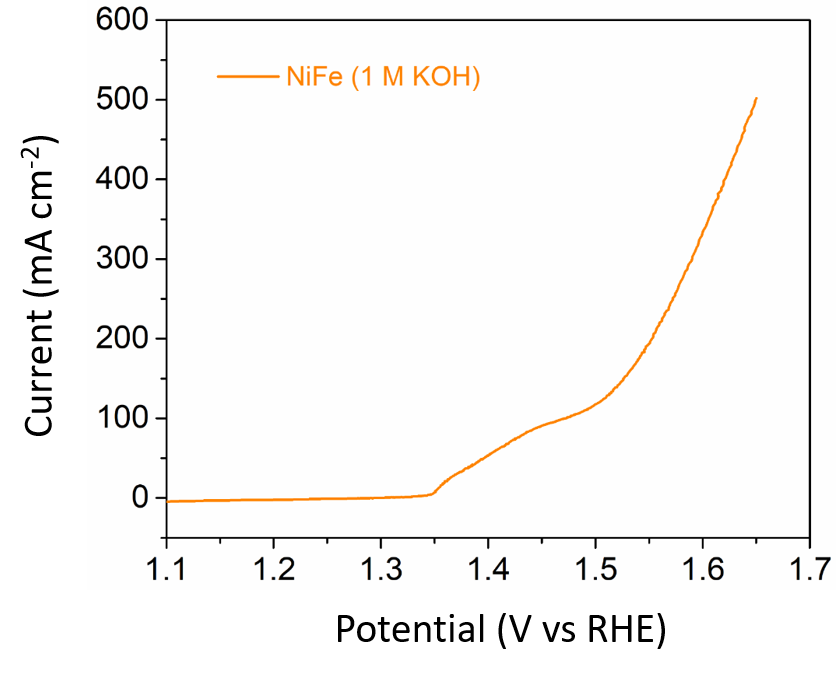


**Supplementary Figure 14 | The LSV curve of NiFe OER catalyst in 1 M KOH.**

Table S1. Contribution to the free energy of adsorbates and non-adsorbed gas-phase molecules from ZPT correction, enthalpic temperature correction, and entropy contribution, respectively. All are given in eV.

| Species | | ZPE |  | *-TS* |
| --- | --- | --- | --- | --- |
| COOH* | 0.62 | | 0.10 | -0.18 |
| CO* | 0.19 | | 0.08 | -0.15 |
| CO2 | 0.31 | | 0.10 | -0.65 |
| CO | 0.14 | | 0.09 | -0.67 |
| H2 | 0.27 | | 0.09 | -0.42 |
| H2O | 0.58 | | 0.10 | -0.65 |

Table S2. EXAFS fitting results of the Ni-N coordination shell.

| Sample | Shell | N | R (Å) | σ2 (Å2) | ΔE0 (eV) |
| --- | --- | --- | --- | --- | --- |
| NiSA | Ni-N | 2.7 | 1.85 | 0.00478 | -7.343 |

Table S3. Comparison of CO2RR in H-cells with the recently reported Ni-N-C, Au, and Ag based catalysts.

| Catalysis | FECO  (%, V vs RHE) | Current density  (mA cm-2, V vs RHE) | Ref. |
| --- | --- | --- | --- |
| **NiSA/NP** | **99% at -0.8 V** | **131 mA cm-2** **at -1.0 V** | **This work** |
| **NiSA** | **98% at -0.8 V** | **71 mA cm-2at -1.0 V** | **This work** |
| NiSA/PCFM | 96% at -0.7 V | 56.1mA cm-2 at -1.0 V | 10 |
| Ni(i)-NCNT@Ni9Cu | 97% at -0.73 V | 32.9 mA cm-2 at -0.73 V | 11 |
| NC-CNTs (Ni) | 90% at -0.8 V | ~9 mA cm-2 at -1.0 V | 12 |
| A-Ni-NG | 97% at -0.72V | 22 mA cm-2 at -0.72 V | 13 |
| C-Zn2Ni1ZIF-8 | 98% at -0.83 V | 72 mA cm-2 at -1.03 V | 14 |
| Ni-N4/C-NH2 | 96% at -0.7 V | ~65 mA cm-2 at -1.0 V | 15 |
| Ag | ~100% at -0.81 V | 9 mA cm-2 at -1.0 V | 16 |
| AgNF | 95% at -1.0 V | 30 mA cm-2 at -1.2 V | 17 |
| Porous Ag | 96% at -1.03 V | 6 mA cm-2 at -1.0 V | 18 |
| Au-PA | 62% at -0.8 V | 10 mA cm-2 at -0.8 V | 19 |
| Nanoporous Au | 98% at -0.5 V | 12 mA cm-2 at -0.5 V | 20 |
| 4H-Au | 90% at -0.7 V | 6 mA cm-2 at -0.7 V | 21 |
| Au19Cd2 | 95% at -0.7 V | 45 mA cm-2 at -0.95 V | 22 |

Table S4. Comparison of CO2RR in MEA full cells with Ni-N-C, Au, Ag, CoPc catalysts.

| Cathode | Anode | *j*CO | Energy efficiency | FECO | Anode electrolyte | Temperature | Ref. |
| --- | --- | --- | --- | --- | --- | --- | --- |
| **NiSA/NP** | **NiFe** | **310 mA cm-2 at -2.3 V** | **57%** | **99%** | **1 M KOH** | **RT** | **This work** |
| Ni-N/PCFM | Ir/C | ~300 mA cm-2 at -2.9 V | 46% | 99% | 0.5 M KHCO3 | RT | 23 |
| Ag | IrOx | ~330 mA cm-2 at -3.0 V | 38% | ~85% | Water with 1 M CsOH activation | 60 °C | 24 |
| Au | IrO2 | ~300 mA cm-2 at -2.65 V | ~43% | ＞85% | Water | 60 °C | 25 |
| CoPc | Ni foam | ~175 mA cm-2 at -2.5 V | 51% | ~95% | 1M KOH | RT | 26 |
|  |  |  |  |  |  |  |  |

**Reference**

1 Kresse, G. & Hafner, J. Ab initio molecular-dynamics simulation of the liquid-metal–amorphous-semiconductor transition in germanium. *Phys. Rev. B* **49**, 14251 (1994).

2 Kresse, G. & Joubert, D. From ultrasoft pseudopotentials to the projector augmented-wave method. *Phys. Rev. B* **59**, 1758 (1999).

3 Kresse, G. & Furthmüller, J. Efficient iterative schemes for ab initio total-energy calculations using a plane-wave basis set. *Phys. Rev. B* **54**, 11169 (1996).

4 Perdew, J. P., Burke, K. & Ernzerhof, M. Generalized gradient approximation made simple. *Phys. Rev. Lett.* **77**, 3865 (1996).

5 Grimme, S., Antony, J., Ehrlich, S. & Krieg, H. A consistent and accurate ab initio parametrization of density functional dispersion correction (DFT-D) for the 94 elements H-Pu. *J. Chem. Phys.* **132**, 154104 (2010).

6 Tang, W., Sanville, E. & Henkelman, G. A grid-based Bader analysis algorithm without lattice bias. *J. Phys. Condens. Matter* **21**, 084204 (2009).

7 Peterson, A. A., Abild-Pedersen, F., Studt, F., Rossmeisl, J. & Nørskov, J. K. How copper catalyzes the electroreduction of carbon dioxide into hydrocarbon fuels. *Energy Environ. Sci.* **3**, 1311-1315 (2010).

8 Ju, W. *et al.* Understanding activity and selectivity of metal-nitrogen-doped carbon catalysts for electrochemical reduction of CO2. *Nat. Commun.* **8**, 944, doi:10.1038/s41467-017-01035-z (2017).

9 Nørskov, J. K. *et al.* Trends in the exchange current for hydrogen evolution. *J. Electrochem. Soc.* **152**, J23-J26 (2005).

10 Yang, H. *et al.* Carbon dioxide electroreduction on single-atom nickel decorated carbon membranes with industry compatible current densities. *Nat. Commun.* **11**, 1-8 (2020).

11 Zhang, T. *et al.* Atomically Dispersed Nickel (I) on an Alloy‐Encapsulated Nitrogen‐Doped Carbon Nanotube Array for High‐Performance Electrochemical CO2 Reduction Reaction. *Angew. Chem.* **132**, 12153-12159 (2020).

12 Fan, Q. *et al.* Activation of Ni Particles into Single Ni–N Atoms for Efficient Electrochemical Reduction of CO2. *Adv. Energy Mater.*, 1903068 (2019).

13 Yang, H. B. *et al.* Atomically dispersed Ni (i) as the active site for electrochemical CO 2 reduction. *Nat. Energy* **3**, 140 (2018).

14 Yan, C. *et al.* Coordinatively unsaturated nickel–nitrogen sites towards selective and high-rate CO2 electroreduction. *Energy Environ. Sci.* **11**, 1204-1210 (2018).

15 Chen, Z. *et al.* Amination strategy to boost the CO2 electroreduction current density of M–N/C single-atom catalysts to the industrial application level. *Energy Environ. Sci.* **14**, 2349-2356 (2021).

16 Wu, X. *et al.* Fast operando spectroscopy tracking in situ generation of rich defects in silver nanocrystals for highly selective electrochemical CO2 reduction. *Nat. Commun.* **12**, 1-11 (2021).

17 Wei, L. *et al.* Thiocyanate-modified silver nanofoam for efficient CO2 reduction to CO. *ACS Catal.* **10**, 1444-1453 (2019).

18 Abeyweera, S. C., Yu, J., Perdew, J. P., Yan, Q. & Sun, Y. Hierarchically 3D porous Ag nanostructures derived from silver benzenethiolate nanoboxes: enabling CO2 reduction with a near-unity selectivity and mass-specific current density over 500 A/g. *Nano Lett.* **20**, 2806-2811 (2020).

19 Zhao, Y., Wang, C., Liu, Y., MacFarlane, D. R. & Wallace, G. G. Engineering surface amine modifiers of ultrasmall gold nanoparticles supported on reduced graphene oxide for improved electrochemical CO2 reduction. *Adv. Energy Mater.* **8**, 1801400 (2018).

20 Lu, X., Yu, T., Wang, H., Qian, L. & Lei, P. Electrochemical Fabrication and Reactivation of Nanoporous Gold with Abundant Surface Steps for CO2 Reduction. *ACS Catal.* **10**, 8860-8869 (2020).

21 Wang, Y. *et al.* Undercoordinated Active Sites on 4H Gold Nanostructures for CO2 Reduction. *Nano Lett.* **20**, 8074-8080 (2020).

22 Li, S. *et al.* Boosting CO2 electrochemical reduction with atomically precise surface modification on gold nanoclusters. *Angew. Chem.* **133**, 6421-6426 (2021).

23 Jeong, H.-Y. *et al.* Achieving highly efficient CO2 to CO electroreduction exceeding 300 mA cm− 2 with single-atom nickel electrocatalysts. *J. Mater. Chem. A* **7**, 10651-10661 (2019).

24 Endrődi, B. *et al.* Operando cathode activation with alkali metal cations for high current density operation of water-fed zero-gap carbon dioxide electrolysers. *Nat. Energy* **6**, 439-448 (2021).

25 Yin, Z. *et al.* An alkaline polymer electrolyte CO2 electrolyzer operated with pure water. *Energy Environ. Sci.* **12**, 2455-2462 (2019).

26 Ren, S. *et al.* Molecular electrocatalysts can mediate fast, selective CO2 reduction in a flow cell. *Science* **365**, 367-369 (2019).
